# Supplementary material for: Integrative Analysis of Gut Microbiota and Fecal Metabolites in Rats after Prednisone Treatment
Source: PubMed Central journal article supplement (PMC8579919; doi:10.1128/spectrum.00650-21), 2021-11-10
Supplement: spectrum00650-21_supp_1_seq10.pdf [file spectrum00650-21_supp_1_seq10.pdf]

## Supplemental Materials For Publication

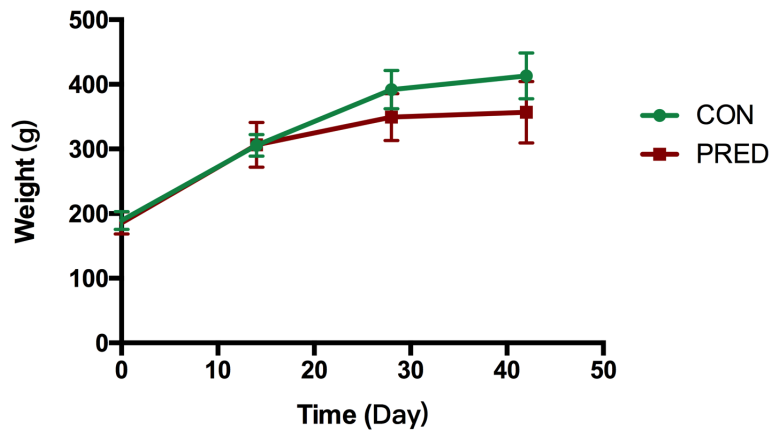

**Figure S1** The body weight of rats with and without 6-week prednisone treatment. There is no significant difference between CON and PRED groups.  $p > 0.05$ . Abbreviations: CON, control group. PRED, prednisone group.

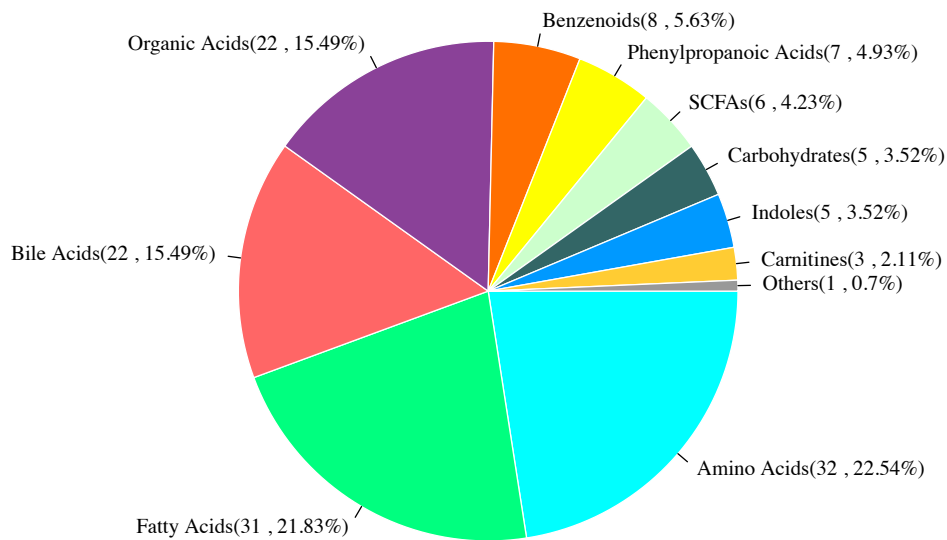

**Figure S2** The classification of identified fecal metabolites. They were classified as amino acids, fatty acids, bile acids, organic acids, benzenoid, phenylpropanoic acids, SCFAs, carbohydrates, indoles, carnitines and others.

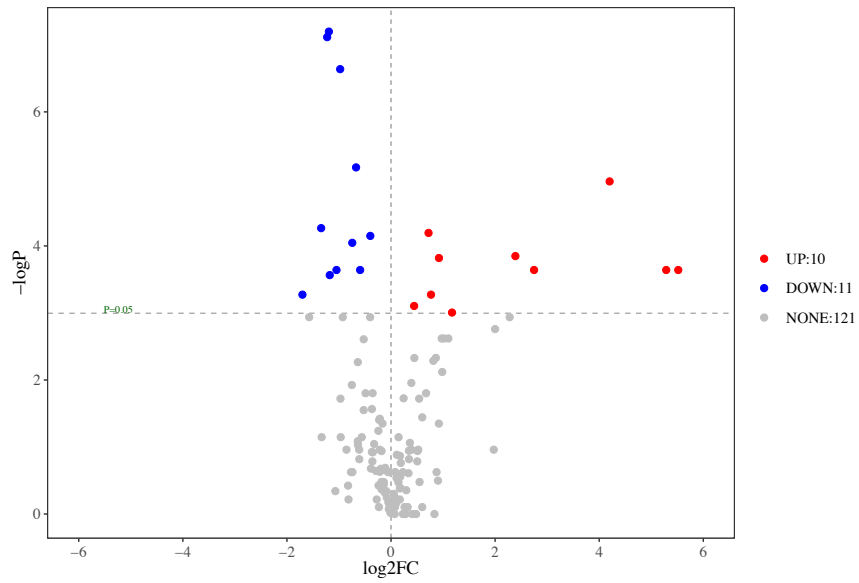

**Figure S3** Volcano plot analysis ( $P < 0.05$ ) were used for identifying differential fecal metabolites. Totally 11 downregulated and 10 upregulated fecal metabolites were identified.

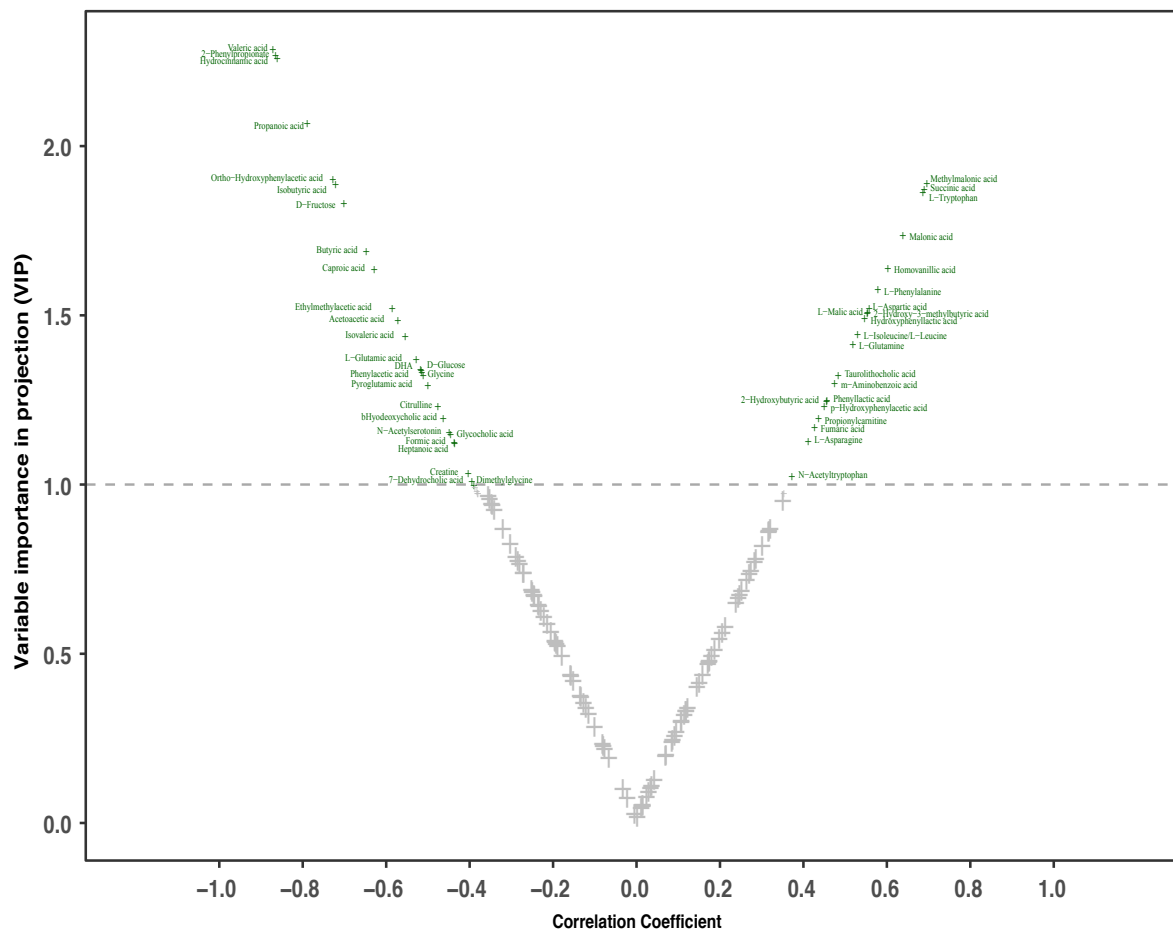

**Figure S4** VIP values  $> 1$  and  $P$  values  $< 0.05$  were the threshold parameters for selecting differential fecal metabolites.

**Supplementary material-1** The detailed information of identified OTUs in rats. Totally 2044 OTUs were detected in rats after 6-week prednisone treatment. Abbreviations: CON, control group. PRED, prednisone group.

**Supplementary material-2** The detected fecal metabolites in rats with and without prednisone treatment. Abbreviations: CON, control group. PRED, prednisone group.
